# Supplementary material for: PD-L1 expression on circulating tumor cells can be a predictive biomarker to PD-1 inhibitors combined with radiotherapy and antiangiogenic therapy in advanced hepatocellular carcinoma
Source: PubMed Central journal article supplement (PMC9379259; doi:10.3389/fonc.2022.873830), 2022-08-02

**Supplementary Table 1.** Treatment details, detailed characteristics and outcome of patients (n = 47).

| ID | PD-1 inhibitor (course) | Targeted agent | OS months | Response | Status |
|----|-------------------------|----------------|-----------|----------|--------|
| 1  | Tislelizumab (14)       | Lenvatinib     | 20.3      | SD       | Death  |
| 2  | Tislelizumab (3)        | Anlotinib      | 4.5       | PD       | Death  |
| 3  | Sintilimab (9)          | Anlotinib      | 11.4      | PR       | Death  |
| 4  | Sintilimab (8)          | Lenvatinib     | 23.6      | PR       | Alive  |
| 5  | Tislelizumab (21)       | Lenvatinib     | 15.9      | CR       | Alive  |
| 6  | Tislelizumab (4)        | Anlotinib      | 7.4       | PR       | Death  |
| 7  | Tislelizumab (2)        | Sorafenib      | 3.1       | PD       | Death  |
| 8  | Tislelizumab (13)       | Lenvatinib     | 12.9      | SD       | Alive  |
| 9  | Tislelizumab (3)        | Lenvatinib     | 5.8       | SD       | Death  |
| 10 | Camrelizumab (3)        | Anlotinib      | 4.9       | SD       | Death  |
| 11 | Sintilimab (6)          | Anlotinib      | 20.1      | SD       | Death  |
| 12 | Sintilimab (6)          | Sorafenib      | 7.8       | PR       | Alive  |
| 13 | Tislelizumab (15)       | Lenvatinib     | 11.4      | PR       | Alive  |
| 14 | Tislelizumab (11)       | Anlotinib      | 13.3      | PR       | Alive  |
| 15 | Tislelizumab (10)       | Lenvatinib     | 13        | PR       | Alive  |
| 16 | Tislelizumab (4)        | Anlotinib      | 5.5       | SD       | Death  |
| 17 | Tislelizumab (7)        | Lenvatinib     | 12.7      | PR       | Alive  |
| 18 | Tislelizumab (9)        | Sorafenib      | 11.8      | PR       | Alive  |
| 19 | Sintilimab (8)          | Sorafenib      | 9.2       | SD       | Alive  |
| 20 | Tislelizumab (2)        | Lenvatinib     | 3.2       | PD       | Death  |
| 21 | Tislelizumab (3)        | Lenvatinib     | 3.7       | SD       | Death  |
| 22 | Sintilimab (5)          | Lenvatinib     | 8.3       | PR       | Alive  |
| 23 | Camrelizumab (6)        | Anlotinib      | 6.2       | SD       | Alive  |
| 24 | Tislelizumab (7)        | Lenvatinib     | 7.9       | PR       | Alive  |
| 25 | Tislelizumab (4)        | Lenvatinib     | 7.9       | SD       | Alive  |
| 26 | Sintilimab (5)          | Anlotinib      | 7.8       | SD       | Alive  |
| 27 | Tislelizumab (3)        | Anlotinib      | 4         | PR       | Death  |
| 28 | Camrelizumab (5)        | Anlotinib      | 10.8      | PR       | Death  |
| 29 | Tislelizumab (4)        | Lenvatinib     | 16.5      | SD       | Alive  |
| 30 | Sintilimab (3)          | Anlotinib      | 5.3       | SD       | Death  |
| 31 | Tislelizumab (22)       | Lenvatinib     | 24.7      | SD       | Alive  |
| 32 | Camrelizumab (3)        | Lenvatinib     | 13.7      | SD       | Alive  |
| 33 | Tislelizumab (9)        | Sorafenib      | 14        | SD       | Alive  |
| 34 | Tislelizumab (7)        | Sorafenib      | 10.9      | SD       | Death  |
| 35 | Tislelizumab (7)        | Anlotinib      | 7.2       | PR       | Alive  |
| 36 | Tislelizumab (8)        | Sorafenib      | 6.9       | PR       | Alive  |
| 37 | Camrelizumab (3)        | Lenvatinib     | 3.3       | SD       | Alive  |
| 38 | Camrelizumab (9)        | Regorafenib    | 6         | SD       | Alive  |
| 39 | Camrelizumab (2)        | Apatinib       | 3         | PD       | Alive  |
| 40 | Tislelizumab (7)        | Anlotinib      | 5.6       | SD       | Alive  |
| 41 | Tislelizumab (5)        | Lenvatinib     | 4.7       | SD       | Alive  |

---

|    |                  |             |     |    |       |
|----|------------------|-------------|-----|----|-------|
| 42 | Camrelizumab (4) | Lenvatinib  | 4.4 | SD | Alive |
| 43 | Camrelizumab (5) | Anlotinib   | 4.2 | SD | Alive |
| 44 | Sintilimab (6)   | Lenvatinib  | 4.2 | SD | Alive |
| 45 | Sintilimab (6)   | Sorafenib   | 4.2 | PR | Alive |
| 46 | Camrelizumab (3) | Lenvatinib  | 2.6 | SD | Alive |
| 47 | Camrelizumab (2) | Regorafenib | 1.4 | SD | Alive |

---

Abbreviations: PD-1, programmed death 1; OS, overall survival; CR, complete response; PR, partial response; SD, stable disease; PD, progressive disease.

---

**Supplementary Table 2.** Univariate Cox regression analysis of progression-free survival and overall survival

| Variable                                           | Progression-free survival |                |           | Overall survival |                   |          |
|----------------------------------------------------|---------------------------|----------------|-----------|------------------|-------------------|----------|
|                                                    | HR                        | 95%CI          | <i>P</i>  | HR               | 95%CI             | <i>P</i> |
| Sex (female/male)                                  | 0.043                     | 0.001-27.007   | 0.338     | 0.045            | 0.001-1177.192    | 0.551    |
| Age ( $\geq 60$ / $< 60$ years)                    | 0.458                     | 0.181-1.160    | 0.100     | 0.319            | 0.072-1.418       | 0.133    |
| Child-Pugh class (B/A)                             | 3.018                     | 1.369-6.657    | 0.006     | 5.135            | 1.717-15.362      | 0.003    |
| Number of tumor ( $\geq 2$ / $< 2$ )               | 5.180                     | 1.648-16.277   | 0.005     | 5.780            | 1.251-26.708      | 0.025    |
| Tumor size ( $\geq 5$ / $< 5$ cm)                  | 1.115                     | 0.383-3.242    | 0.842     | 0.774            | 0.213-2.817       | 0.698    |
| AFP ( $\geq 400$ / $< 400$ ng/ml)                  | 5.109                     | 2.087-12.51    | $< 0.001$ | 3.789            | 1.283-11.188      | 0.016    |
| ECOG PS (1-2/0)                                    | 1.386                     | 0.628-3.060    | 0.419     | 1.542            | 0.518-4.595       | 0.437    |
| PD-L1 <sup>+</sup> CTC counts ( $< 2$ / $\geq 2$ ) | 0.513                     | 0.234-1.126    | 0.096     | 0.142            | 0.039-0.520       | 0.003    |
| BCLC stage (B/C)                                   | 0.046                     | 0.001-5792.205 | 0.608     | 0.046            | 0.001-8470444.981 | 0.752    |
| Portal vein invasion (no/yes)                      | 0.639                     | 0.084-4.846    | 0.665     | 0.044            | 0.001-6856.645    | 0.609    |
| HBV (positive/negative)                            | 1.275                     | 0.508-3.200    | 0.605     | 1.016            | 0.275-3.755       | 0.981    |
| HCV (positive/negative)                            | 1.143                     | 0.268-4.878    | 0.857     | 1.041            | 0.134-8.119       | 0.969    |
| Alcoholism (positive/negative)                     | 1.755                     | 0.793-3.883    | 0.165     | 1.510            | 0.533-4.277       | 0.438    |
| Lymph node metastasis (yes/no)                     | 1.817                     | 0.833-3.966    | 0.134     | 2.318            | 0.788-6.820       | 0.127    |
| Extrahepatic metastases (yes/no)                   | 1.482                     | 0.618-3.553    | 0.378     | 0.678            | 0.180-2.550       | 0.565    |
| Previous therapy (yes/no)                          | 0.713                     | 0.326-1.560    | 0.397     | 0.487            | 0.158-1.503       | 0.210    |

Abbreviations: HR, hazard ratio; CI, confidence interval; AFP, alpha fetoprotein; ECOG PS, Eastern Cooperative Oncology Group performance status; PD-L1, programmed death-ligand 1; CTCs, circulating tumor cells; BCLC, Barcelona Clinic Liver Cancer; HBV, hepatitis B virus; HCV, hepatitis C virus;

**Supplemental Table 3.** Details of CTCs and PD-L1<sup>+</sup> CTCs counts in the all patients

| ID | T0         |                               | T1         |                               | T2         |                               | ORR |
|----|------------|-------------------------------|------------|-------------------------------|------------|-------------------------------|-----|
|    | CTC counts | PD-L1 <sup>+</sup> CTC counts | CTC counts | PD-L1 <sup>+</sup> CTC counts | CTC counts | PD-L1 <sup>+</sup> CTC counts |     |
| 1  | 4          | 1                             | 2          | 1                             | -          | -                             | No  |
| 2  | 6          | 3                             | 0          | 0                             | -          | -                             | No  |
| 3  | 3          | 1                             | 0          | 0                             | -          | -                             | Yes |
| 4  | 0          | 0                             | -          | -                             | -          | -                             | Yes |
| 5  | 6          | 1                             | 0          | 0                             | -          | -                             | Yes |
| 6  | 8          | 5                             | 5          | 3                             | 3          | 1                             | Yes |
| 7  | 9          | 4                             | 3          | 2                             | -          | -                             | No  |
| 8  | 9          | 2                             | 3          | 1                             | 3          | 1                             | No  |
| 9  | 6          | 2                             | 3          | 1                             | -          | -                             | No  |
| 10 | 7          | 2                             | 6          | 3                             | -          | -                             | No  |
| 11 | 3          | 2                             | 1          | 1                             | -          | -                             | No  |
| 12 | 5          | 1                             | 2          | 1                             | -          | -                             | Yes |
| 13 | 4          | 1                             | 1          | 0                             | 3          | 1                             | Yes |
| 14 | 7          | 1                             | 6          | 3                             | 5          | 2                             | Yes |
| 15 | 2          | 0                             | 1          | 0                             | 3          | 1                             | Yes |
| 16 | 5          | 1                             | 1          | 1                             | -          | -                             | No  |
| 17 | 6          | 1                             | 4          | 1                             | -          | -                             | Yes |
| 18 | 6          | 1                             | 2          | 0                             | -          | -                             | Yes |
| 19 | 8          | 1                             | 3          | 2                             | -          | -                             | No  |
| 20 | 7          | 2                             | 9          | 4                             | -          | -                             | No  |
| 21 | 8          | 2                             | 2          | 1                             | -          | -                             | No  |
| 22 | 9          | 1                             | 5          | 0                             | -          | -                             | Yes |
| 23 | 5          | 2                             | 0          | 0                             | 2          | 1                             | No  |
| 24 | 3          | 1                             | 0          | 0                             | 2          | 1                             | Yes |
| 25 | 3          | 1                             | 0          | 0                             | -          | -                             | No  |
| 26 | 8          | 5                             | -          | -                             | -          | -                             | No  |
| 27 | 9          | 2                             | 5          | 1                             | 0          | 0                             | Yes |
| 28 | 7          | 2                             | 2          | 1                             | -          | -                             | Yes |
| 29 | 4          | 1                             | 1          | 0                             | -          | -                             | No  |
| 30 | 5          | 1                             | 3          | 2                             | -          | -                             | No  |
| 31 | 0          | 0                             | 0          | 0                             | -          | -                             | No  |
| 32 | 4          | 1                             | -          | -                             | -          | -                             | No  |
| 33 | 3          | 2                             | 4          | 2                             | -          | -                             | No  |
| 34 | 6          | 2                             | -          | -                             | -          | -                             | No  |
| 35 | 6          | 1                             | 0          | 0                             | 0          | 0                             | Yes |
| 36 | 5          | 2                             | 4          | 1                             | 3          | 1                             | Yes |
| 37 | 7          | 2                             | 2          | 1                             | -          | -                             | No  |
| 38 | 6          | 2                             | 2          | 1                             | 2          | 1                             | No  |
| 39 | 6          | 1                             | 2          | 2                             | -          | -                             | No  |

---

|    |   |   |   |   |   |   |     |
|----|---|---|---|---|---|---|-----|
| 40 | 5 | 1 | 2 | 1 | 1 | 1 | No  |
| 41 | 6 | 2 | 2 | 1 | - | - | No  |
| 42 | 9 | 2 | 4 | 3 | - | - | No  |
| 43 | 9 | 2 | 3 | 1 | 2 | 1 | No  |
| 44 | 4 | 2 | - | - | - | - | No  |
| 45 | 5 | 1 | 2 | 1 | 3 | 2 | Yes |
| 46 | 8 | 2 | 3 | 2 | - | - | No  |
| 47 | 6 | 4 | 3 | 1 | - | - | No  |

---

Abbreviations: CTC, circulating tumor cells; PD-L1, programmed death-ligand 1; ORR, objective response rate.

---

**Supplementary Fig. 1.** Kaplan-Meier plots: (A) progression-free survival and (B) overall survival based on PD-L1 expression on CTCs at T1. Abbreviations: HR, hazard ratio; CI, confidence interval; CTCs, circulating tumor cells; PD-L1, programmed death-ligand 1.

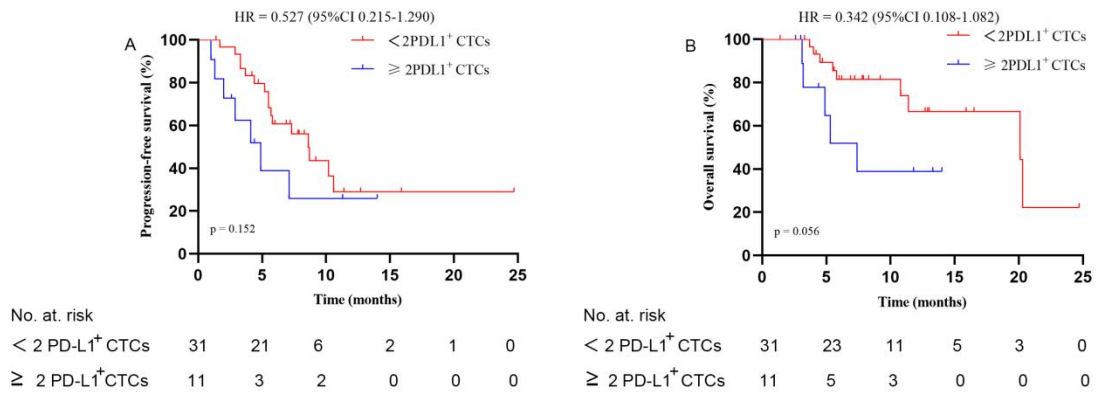

Supplement: DataSheet_1.pdf [file DataSheet_1.pdf]
